# Supplementary material for: Coordinating ligand functionalized AgNPs for colorimetric sensing: effect of subtle structural and conformational change of ligand on the selectivity
Source: Royal Society of Chemistry journal article supplement (doi:10.1039/c4ra13586e), 2014-01-01
Supplement: c4ra13586e1.pdf [file c4ra13586e1.pdf]

## Coordinating ligand functionalized AgNPs for colorimetric sensing: Effect of subtle structural and conformational change of ligand on the selectivity

V. Vinod Kumar and Savarimuthu Philip Anthony\*

School of Chemical and Biotechnology, SASTRA University, Thanjavur-613402,

Tamil Nadu, INDIA, Fax: +914362264120; Tel: +914362264101;

E-mail: [philip@biotech.sastra.edu](mailto:philip@biotech.sastra.edu)

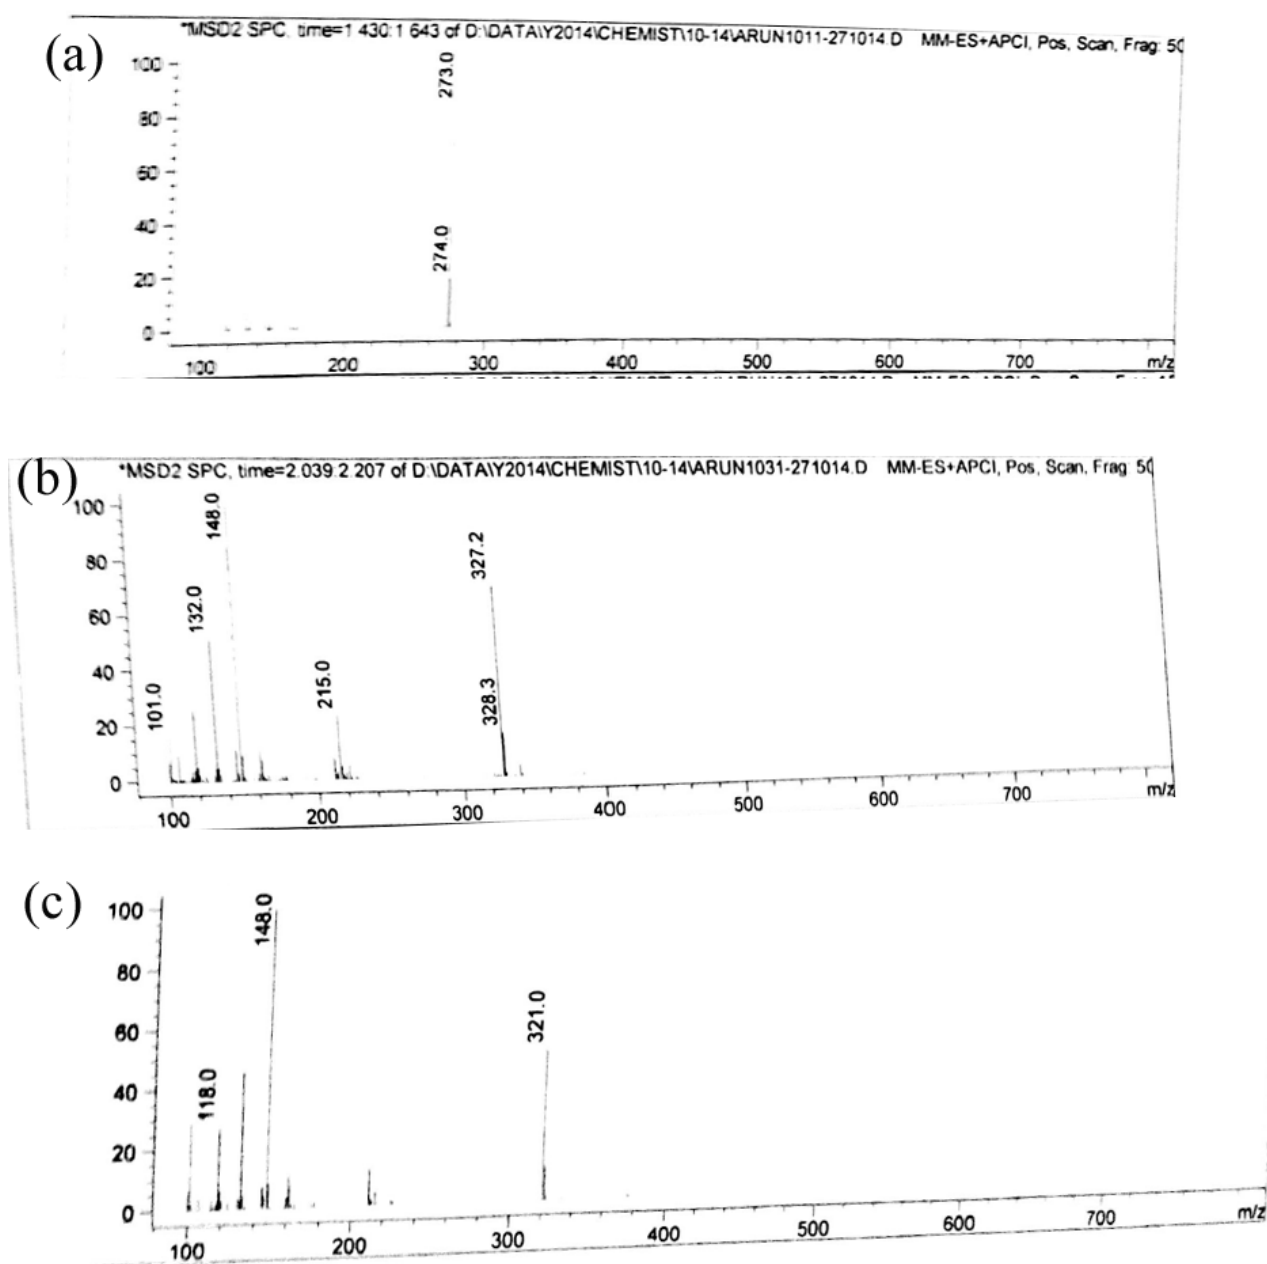

Fig. S1. LC-MS of (a) 1 (b) 2 and (c) 3.

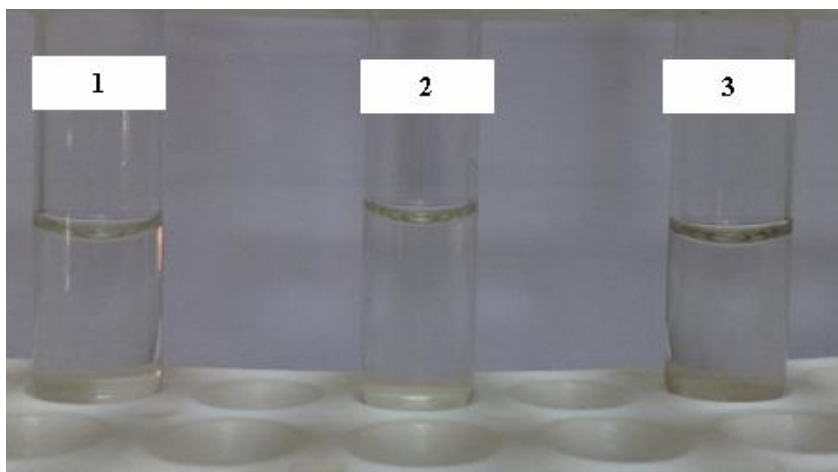

Figure S2. Digital image of 1-3 dissolved in water.

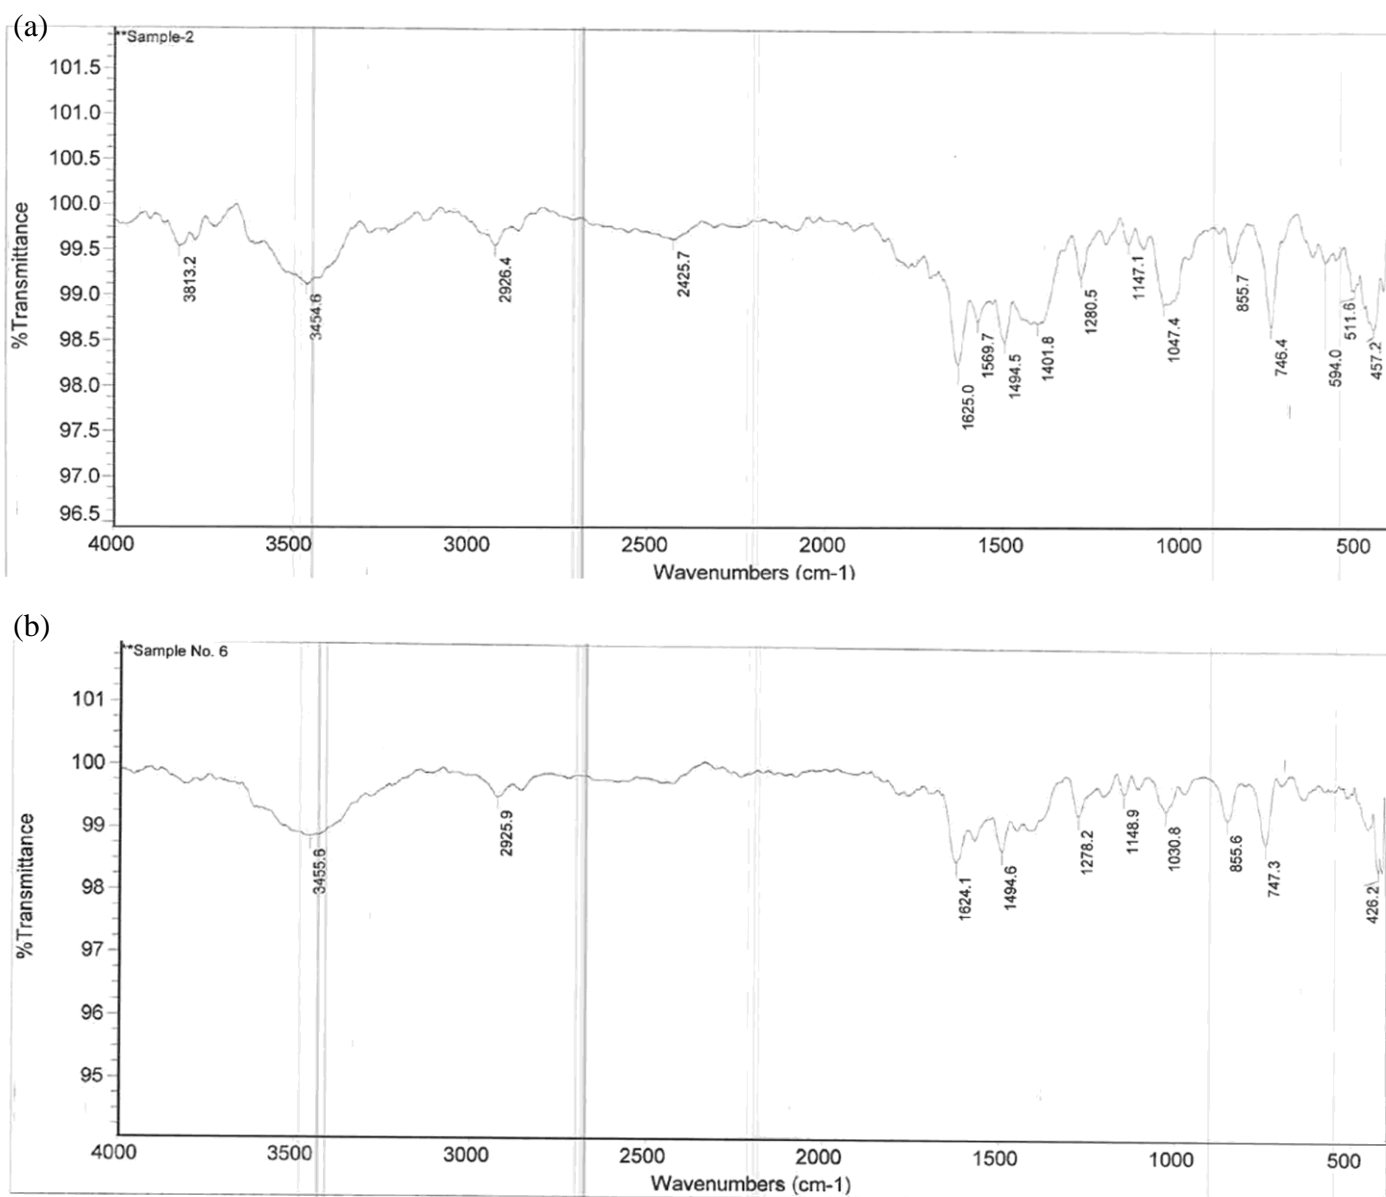

Fig. S3. FT-IR spectra 1 (a) and 1-AgNPs (b).

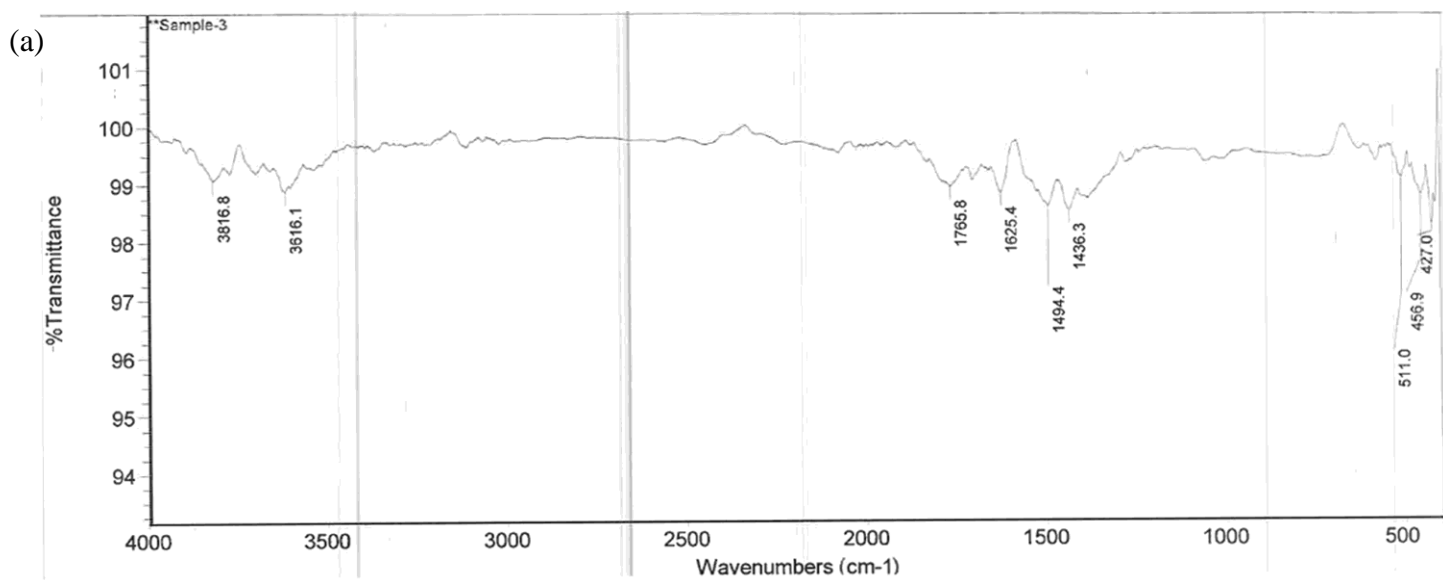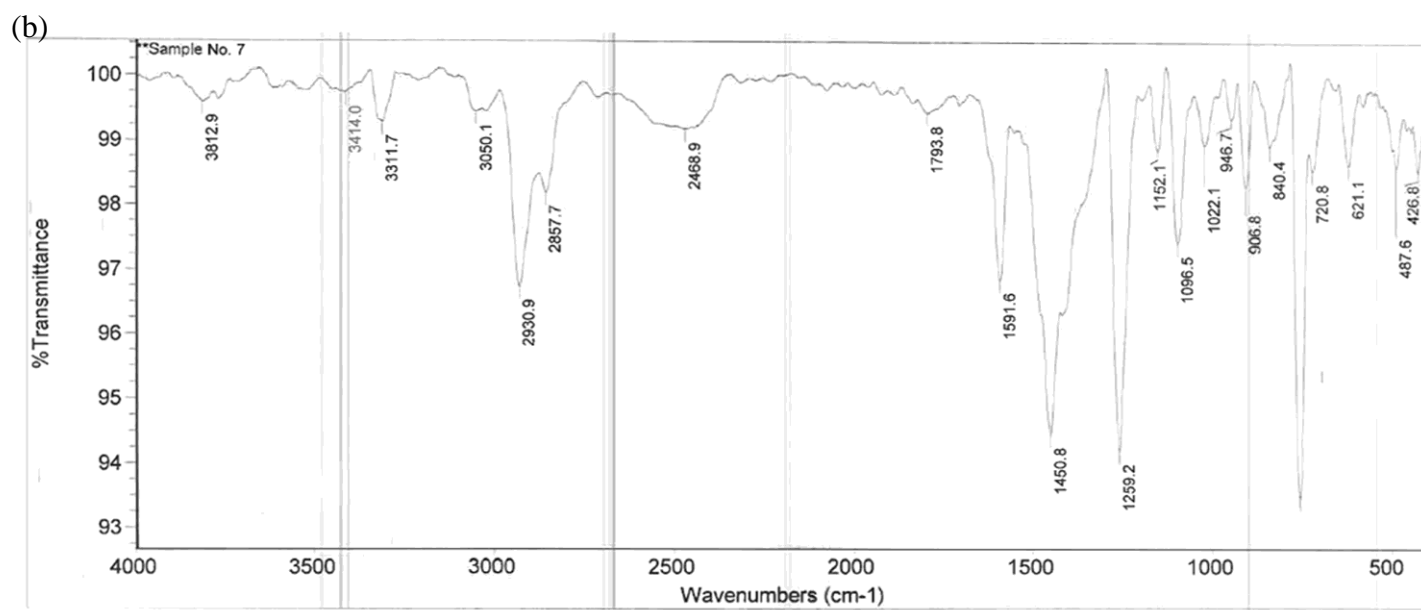

Fig. S3. FT-IR spectra 2 (a) and 2-AgNPs (b).

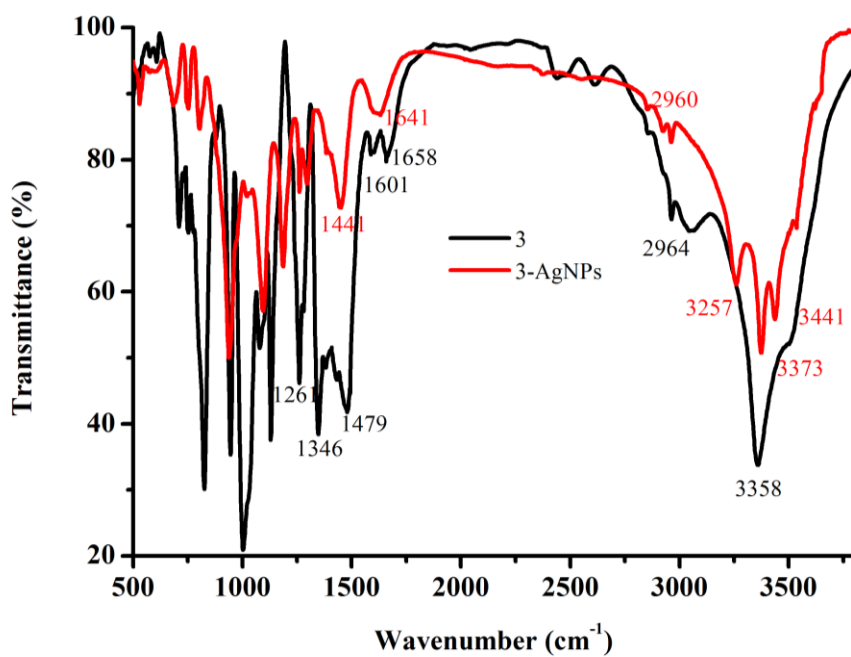

Fig. S3. FT-IR spectra 3 (a) and 3-AgNPs (b).

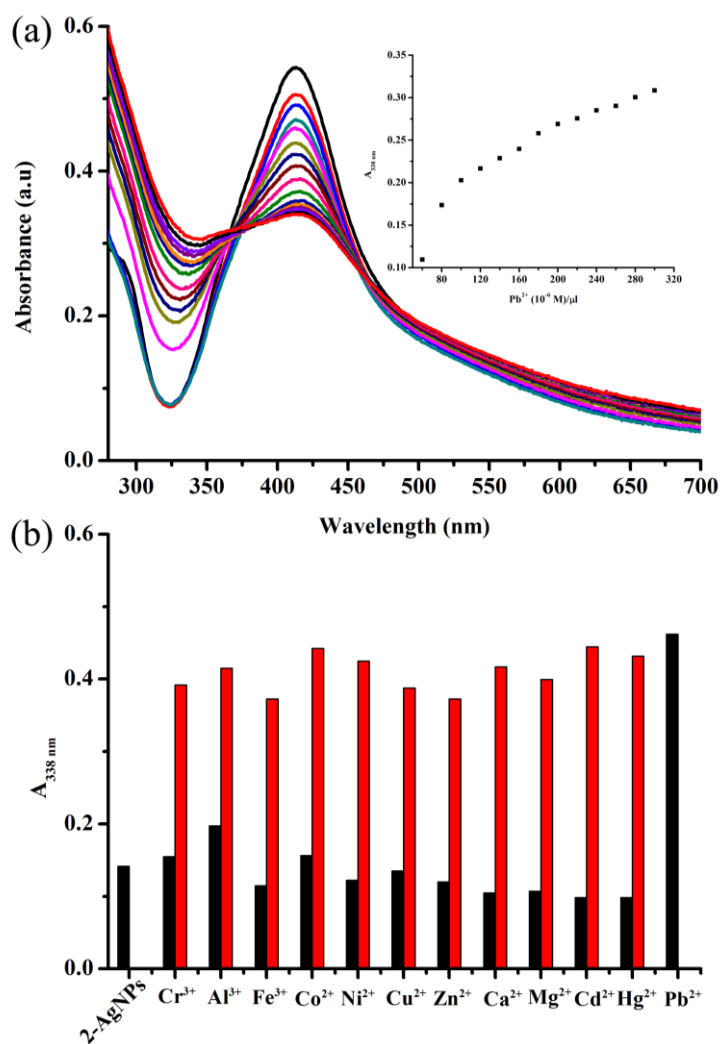

Fig. S4. Change of 2-AgNPs absorbance with  $\text{Pb}^{2+}$  concentration (a) and selectivity studies of 2-AgNPs for  $\text{Pb}^{2+}$  ( $10^{-6} \text{ M}$ ) in presence of different metal ions ( $10^{-3} \text{ M}$ ).

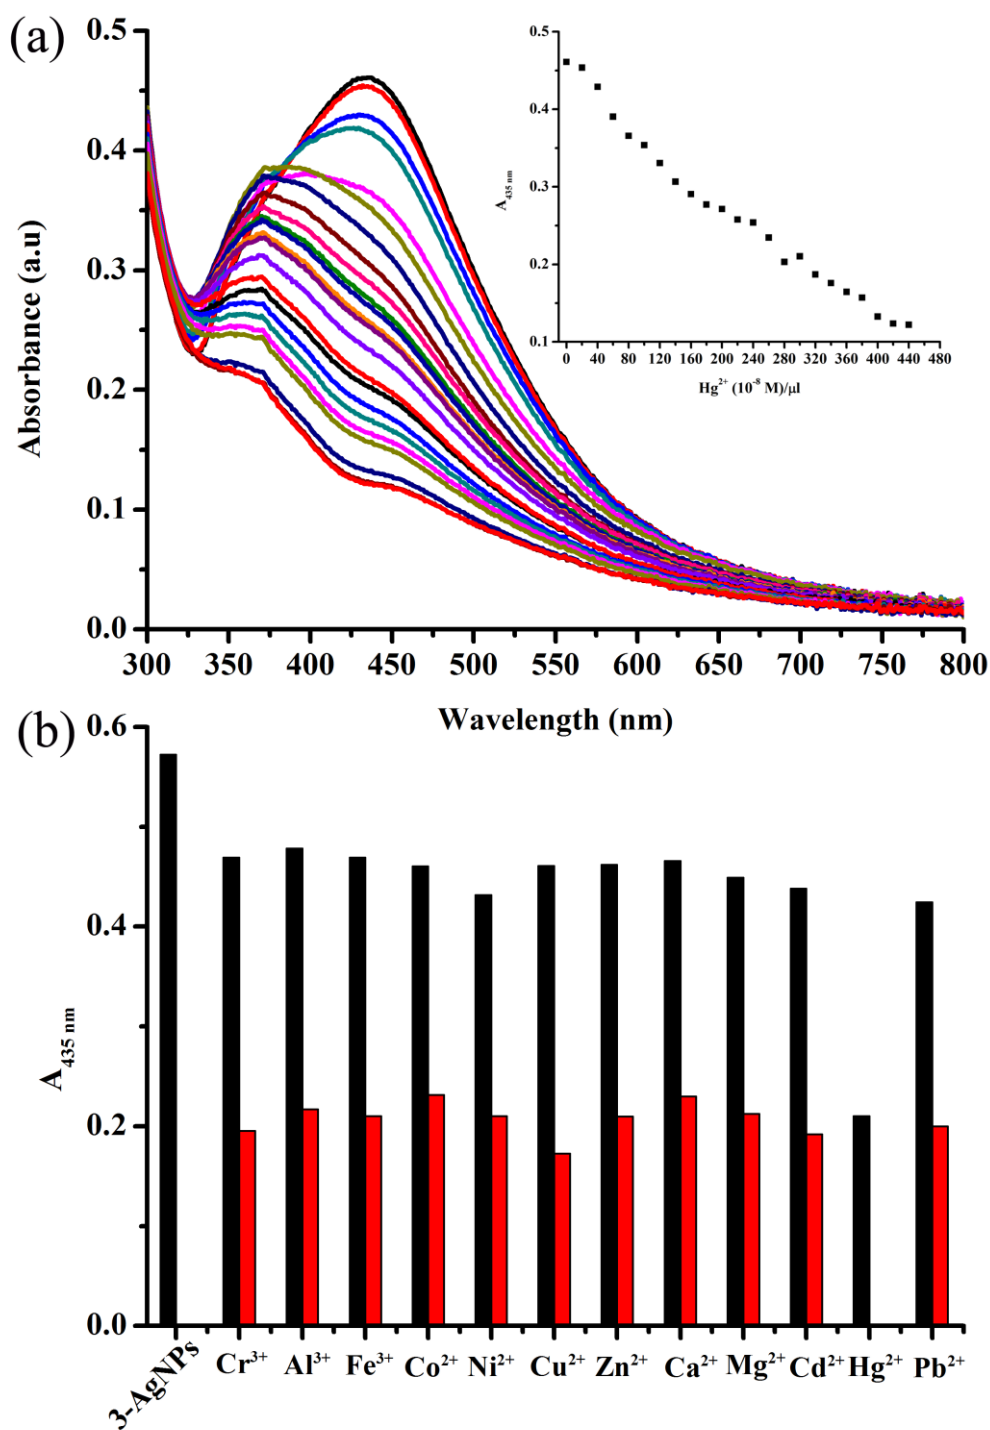

Fig. S5. Change of 3-AgNPs absorbance with  $\text{Hg}^{2+}$  concentration (a) and selectivity studies of 3-AgNPs for  $\text{Hg}^{2+}$  ( $10^{-6} \text{ M}$ ) in presence of different metal ions ( $10^{-3} \text{ M}$ ).

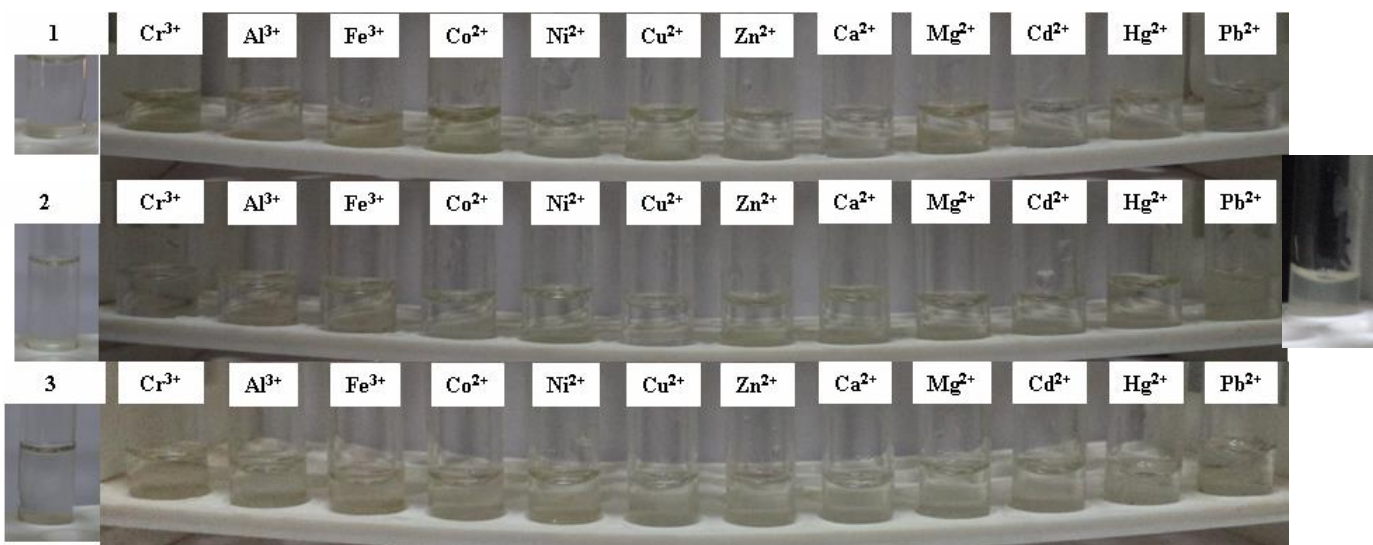

Figure S6. Digital images of 1-3 with different metal cations in aqueous solution.  $\text{Pb}^{2+}$  with 2 is shown in black background also for better clarity of turbidity.

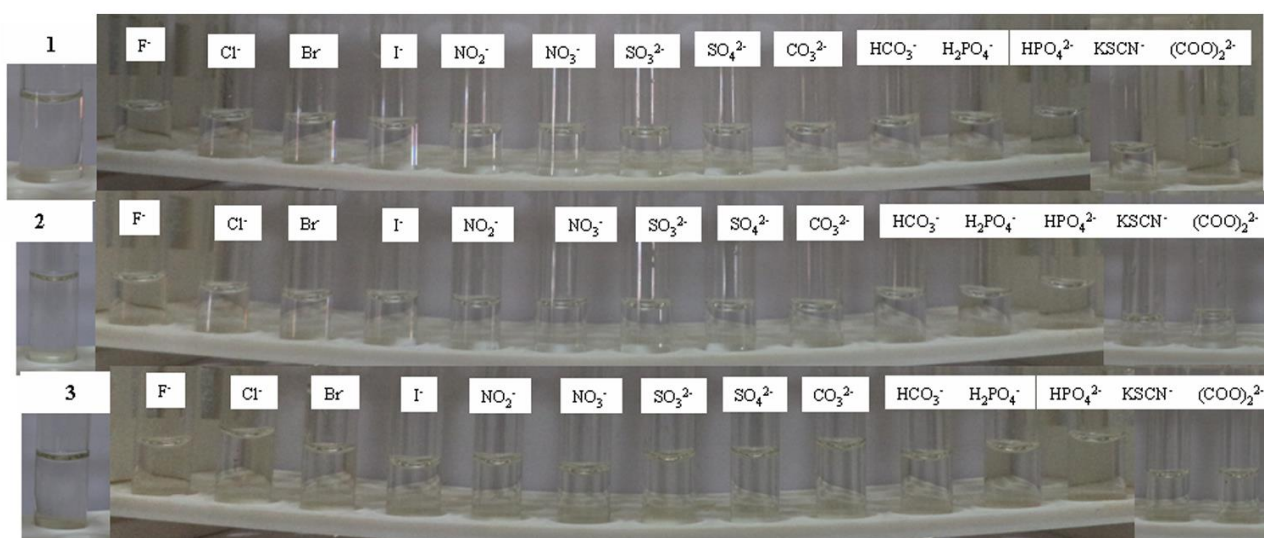

Figure S7. Digital images of 1-3 with different anions in aqueous solution.

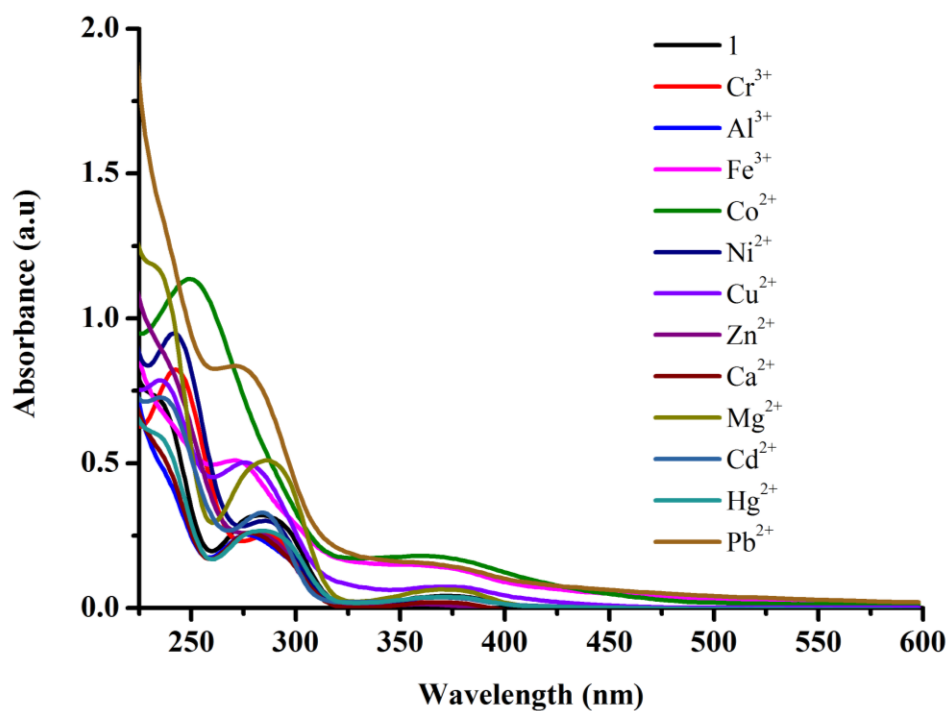

Figure S8. Absorption spectra of 1 with different cations in aqueous solution.

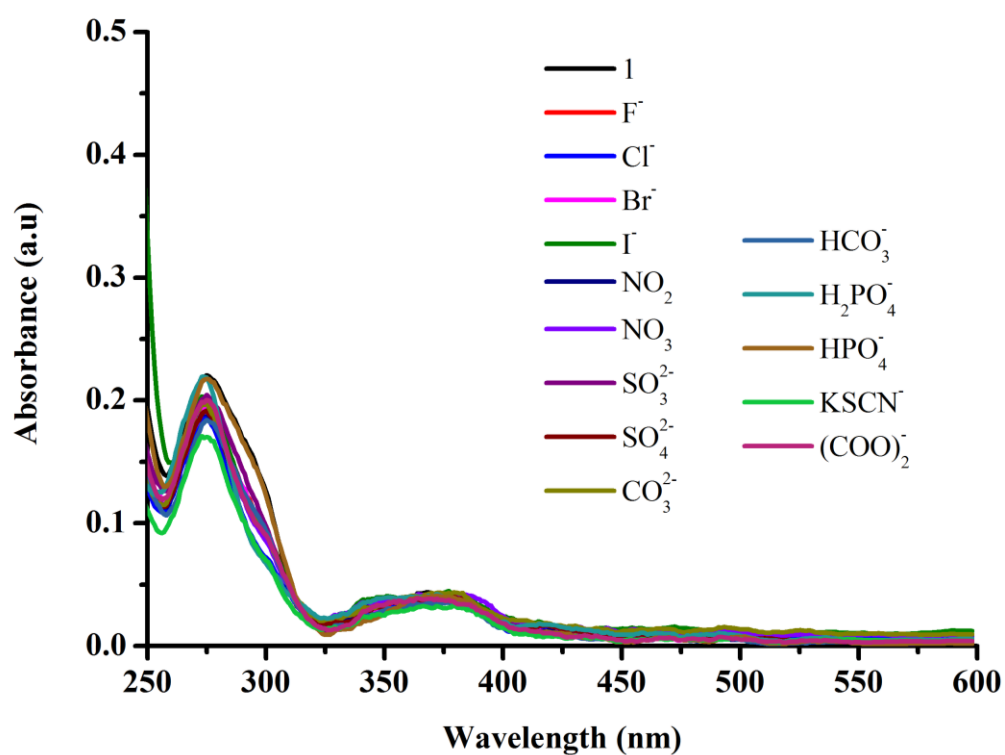

Figure S9. Absorption spectra of 1 with different anions in aqueous solution.

Table S1. Zeta potential of 1-, 2- and 3-AgNPs.

| <b>Compound</b> | <b>Zeta potential (mV)</b> |
|-----------------|----------------------------|
| 1-AgNPs         | -24.6                      |
| 2-AgNPs         | -23.7                      |
| 3-AgNPs         | -4.8                       |
